# Supplementary material for: A multifunctional organogel for constructing artificial light harvesting systems with excellent energy transfer efficiency
Source: Royal Society of Chemistry journal article supplement (doi:10.1039/d3lf00163f), 2023-09-28
Supplement: d3lf00163f1.pdf [file d3lf00163f1.pdf]

## SUPPORTING INFORMATION

### **A multifunctional organogel for constructing artificial light harvesting systems with excellent energy transfer efficiency**

Xinxian Ma,<sup>#\*</sup> Jiahong Tang,<sup>#</sup> Tianqi Ren, Jiali Zhang, Yuehua Liang, Jiuzhi Wei, Enke Feng

*College of Chemistry and Chemical Engineering, Ningxia Normal University, Guyuan 756000, People's Republic of China. Fax: 86 954 2079637; Tel: 86 954 2079637; E-mail: maxinxian@163.com*

#### **1. Experimental section**

##### **1.1 Materials**

Polyvinyl alcohol (PVA, polymerization degree 1799, 98-99% alcoholysis), telmisartan (Tmt), ethylene glycol and dimethyl sulfoxide (DMSO) were provided by Shanghai Energy Chemical Co..

##### **1.2 Preparation of organogel**

The fluorescent organogel was prepared by esterification which just need a simple one-step reaction. The Tmt powder (0.2 g) was dissolved in DMSO (10 mL) and stirred for 30 minute at 120 °C. Next, PVA (1.5 g) was added into the Tmt solution above, and reacted at 120 °C for 5h. After cooled to 50 °C, added 1 mL glycol to the mixture and stirred well. Finally, poured the mixture into the surface dish, and it can be slowly formed into gel state for a while at -20 °C.

##### **1.3 Construction of ALHSs**

The Tmt powder was dissolved in DMSO and stirred for 30 minute at 120 °C. Next, PVA was added into the Tmt solution above, and reacted at 120 °C for 5h. After cooled the PVA/Tmt systems to 50 °C, and added the fluorescent dyes glycol solution (different concentrations) to stirred continuously. The ALHSs based on organogels were completed.

#### **2. Preparation method of xerogel**

The obtained gel sample was soaked in anhydrous ethanol for a while and placed in a constant temperature oven at 70 °C for seven days, and the xerogel required for SEM was successfully prepared.

**Fig. S1.** Frequency dependence of  $G'$  (storage modulus) and  $G''$  (loss modulus) for PVA/Tmt organogel at different Shear stress. Condition:  $68 \text{ rad s}^{-1}$  frequency, 10Hz constant frequency.

**Fig. S2.** Frequency dependence of  $G'$  (storage modulus) and  $G''$  (loss modulus) for PVA/Tmt/AYG organogel at different Shear stress. Condition:  $68 \text{ rad s}^{-1}$  frequency, 10Hz constant frequency.

**Fig. S3.** Frequency dependence of  $G'$  (storage modulus) and  $G''$  (loss modulus) for PVA/Tmt/RhB organogel at different Shear stress. Condition:  $68 \text{ rad s}^{-1}$  frequency, 10Hz constant frequency.

**Fig. S4.** Photos of the recyclability of PVA/Tmt/RhB organogel.

**Fig. S5.** UV-vis spectrum of PVA and PVA/Tmt organogels.

**Fig. S6.** (a) Fluorescence lifetime of PVA/Tmt organogel ( $[Tmt] = 1.5 \times 10^{-6}$  mol. Monitored at 375 nm upon excitation at 333 nm). (b) Fluorescence lifetime of PVA/Tmt/AYG organogel ( $[Tmt] = 1.5 \times 10^{-6}$  mol,  $[AYG] = 1.5 \times 10^{-8}$  mol. Monitored at 375 nm upon excitation at 333 nm).

**Table S1.** Fluorescence lifetimes of PVA/Tmt organogel, PVA/Tmt/AYG organogel ( $[Tmt] = 1.5 \times 10^{-6}$  mol,  $[AYG] = 1.5 \times 10^{-8}$  mol, respectively).

| Sample                | $\tau_1$ /ns | RW <sub>1</sub> [%] | $\tau_2$ /ns | RW <sub>2</sub> [%] | $\tau$ /ns | $\chi^2$ |
|-----------------------|--------------|---------------------|--------------|---------------------|------------|----------|
| PVA/Tmt organogel     | 0.93         | 46.32               | 4.30         | 53.68               | 2.74       | 1.172    |
| PVA/Tmt/AYG organogel | 0.91         | 68.35               | 1.85         | 31.65               | 1.21       | 1.267    |

**Fig. S7.** Fluorescence decay profiles of PVA/Tmt organogel (red line,  $[Tmt] = 1.5 \times 10^{-6}$  mol. Monitored at 375 nm upon excitation at 333 nm) and PVA/Tmt/AYG organogel assembly (black line,  $[Tmt] = 1.5 \times 10^{-6}$  mol,  $[AYG] = 1.5 \times 10^{-8}$  mol, Monitored at 375 nm upon excitation at 333 nm).

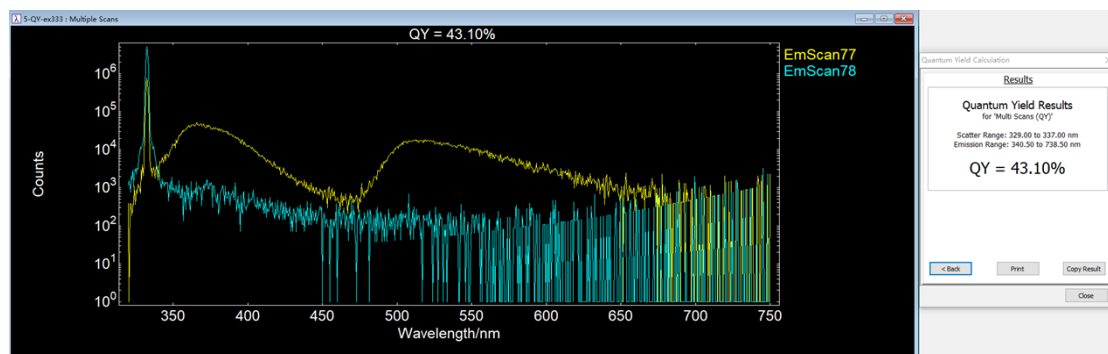

**Fig. S8.** Quantum yield diagram of PVA/Tmt/AYG organogel with luminescence range of 450–700 nm ( $[Tmt] = 1.5 \times 10^{-6}$  mol,  $[AYG] = 1.5 \times 10^{-8}$  mol).

**Fig. S9.** (a) Fluorescence lifetime of PVA/Tmt organogel ( $[Tmt] = 1.5 \times 10^{-6}$  mol. Monitored at 375 nm upon excitation at 350 nm). (b) Fluorescence lifetime of PVA/Tmt/RhB organogel ( $[Tmt] = 1.5 \times 10^{-6}$  mol,  $[RhB] = 1.5 \times 10^{-8}$  mol. Monitored at 375 nm upon excitation at 350 nm).

**Table S2.** Fluorescence lifetimes of PVA/Tmt organogel, PVA/Tmt/RhB organogel ( $[Tmt] = 1.5 \times 10^{-6}$  mol,  $[RhB] = 1.5 \times 10^{-8}$  mol, respectively).

| Sample                | $\tau_1/ns$ | RW <sub>1</sub> [%] | $\tau_2/ns$ | RW <sub>2</sub> [%] | $\tau/ns$ | $\chi^2$ |
|-----------------------|-------------|---------------------|-------------|---------------------|-----------|----------|
| PVA/Tmt organogel     | 0.7645      | 74.42               | 2.73        | 25.58               | 1.27      | 1.278    |
| PVA/Tmt/RhB organogel | 0.7642      | 75.30               | 2.45        | 24.70               | 1.18      | 1.267    |

**Fig. S10.** Fluorescence decay profiles of PVA/Tmt organogel (red line,  $[Tmt] = 1.5 \times 10^{-6}$  mol. Monitored at 375 nm upon excitation at 350 nm) and PVA/Tmt/RhB organogel assembly (black line,  $[Tmt] = 1.5 \times 10^{-6}$  mol,  $[RhB] = 1.5 \times 10^{-8}$  mol, Monitored at 375 nm upon excitation at 350 nm).

**Fig. S11.** Quantum yield diagram of PVA/Tmt/RhB organogel with luminescence range of 520–700 nm ( $[Tmt] = 1.5 \times 10^{-6}$  mol,  $[RhB] = 1.5 \times 10^{-8}$  mol).

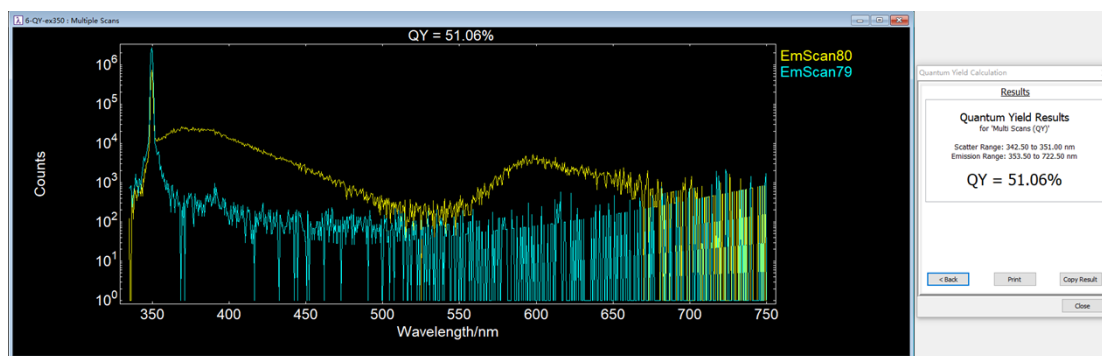



**Fig. S12.** Fluorescence spectra of PVA/Tmt-AYG in the DMSO and ethylene glycol binary solven with different content of AYG (100:1, [Tmt] =  $1.5 \times 10^{-6}$  mol, [AYG] =  $1.5 \times 10^{-8}$  mol, and  $\lambda_{\text{ex}} = 333$  nm).

Energy-transfer efficiency ( $\Phi_{\text{ET}}$ ) was calculated from spectra using equation S1.

$$\Phi_{\text{ET}} = 1 - I_{\text{DA},333}/I_{\text{D},333} \text{ (eq. S1)}^{1-3}$$

Where  $I_{\text{DA}}$  and  $I_{\text{D}}$  are the fluorescence intensities of the excitation of PVA/Tmt-AYG assembly (donor and acceptor) and Tmt assembly (donor), respectively at 333 nm.

The highest  $\Phi_{\text{ET}}$  value was calculated as 82.77% in solvent, measured under the condition of [Tmt] =  $1.5 \times 10^{-6}$  mol, [AYG] =  $1.5 \times 10^{-8}$  mol, and  $\lambda_{\text{ex}} = 333$  nm.

**Fig. S13.** Fluorescence spectra of PVA/Tmt-RhB in the DMSO and ethylene glycol binary solven with different content of RhB (100:1, [Tmt] =  $1.5 \times 10^{-6}$  mol, [RhB] =  $1.5 \times 10^{-8}$  mol, and  $\lambda_{\text{ex}} = 350$  nm).

$\Phi_{\text{ET}}$  was calculated from spectra using equation S2.

$$\Phi_{\text{ET}} = 1 - I_{\text{DA},350}/I_{\text{D},350} \text{ (eq. S2)}^{1-3}$$

Where  $I_{\text{DA}}$  and  $I_{\text{D}}$  are the fluorecence intensities of the excitation of PVA/Tmt-RhB assembly (donor and acceptor) and Tmt assembly (donor), respectively at 411 nm.

The highest  $\Phi_{\text{ET}}$  value was calculated as 16.58% in solvent, measured under the condition of [Tmt] =  $1.5 \times 10^{-6}$  mol, [RhB] =  $1.5 \times 10^{-8}$  mol, and  $\lambda_{\text{ex}} = 350$  nm.

**Fig. S14.** Line chart of energy transfer efficiency of PVA/Tmt/AYG and PVA/Tmt/RhB organogel at different proportions.

**Fig. S15.** Red line: Fluorescence spectra of PVA/Tmt-AYG in the DMSO and ethylene glycol binary solven, which was normalized according to the fluorescence intensity at 365 nm of the black line ( $\lambda_{\text{ex}} = 333$  nm) ( $[\text{Tmt}] = 1.5 \times 10^{-6}$  mol,  $[\text{AYG}] = 1.5 \times 10^{-8}$  mol); the black line represents the fluorescence spectrum of PVA/Tmt.

The antenna effect (AE) was calculated based on the excitation spectra using equation S3.

$$\text{AE} = (I_{\text{DA},333} - I_{\text{D},333}) / I_{\text{A},333} \text{ (eq. S3)}$$

Where  $I_{\text{DA},333}$  and  $I_{\text{D},333}$  are the fluorescence intensities at 500 nm with the excitation of the donor at 333 nm and the direct excitation of the acceptor at 333 nm, respectively.  $I_{\text{D},333}$  is the fluorescence intensities at 500 nm of the PVA/Tmt assembly, which was normalized with the PVA/Tmt-AYG assembly at 376 nm.

The antenna effect value was calculated as 16.8690 in the DMSO and ethylene glycol binary solven, measured under the condition of  $[\text{Tmt}] = 1.5 \times 10^{-6}$  mol,  $[\text{AYG}] = 1.5 \times 10^{-8}$  mol.

**Fig. S16.** Red line: Fluorescence spectra of PVA/Tmt-RhB in the DMSO and ethylene glycol binary solven, which was normalized according to the fluorescence intensity at 387 nm of the black line ( $\lambda_{\text{ex}} = 350$  nm) ( $[\text{Tmt}] = 1.5 \times 10^{-6}$  mol,  $[\text{RhB}] = 1.5 \times 10^{-8}$  mol); the black line represents the fluorescence spectrum of PVA/Tmt.

The antenna effect (AE) was calculated based on the excitation spectra using equation S4.

$$\text{AE} = (I_{\text{DA},350} - I_{\text{D},350}) / I_{\text{A},350} \text{ (eq. S4)}$$

Where  $I_{\text{DA},350}$  and  $I_{\text{D},350}$  are the fluorescence intensities at 589 nm with the excitation of the donor at 350 nm and the direct excitation of the acceptor at 350 nm, respectively.  $I_{\text{D},333}$  is the fluorescence intensities at 589 nm of the PVA/Tmt assembly, which was normalized with the PVA/Tmt-RhB assembly at 387 nm.

The antenna effect value was calculated as 1.7889 in the DMSO and ethylene glycol binary solven, measured under the condition of  $[\text{Tmt}] = 1.5 \times 10^{-6}$  mol,  $[\text{RhB}] = 1.5 \times 10^{-8}$  mol.

## References

- (1) R. Gao and D. Yan, *Chem. Sci.*, 2017, **8**, 590–599.
- (2) S. Guo, Y. Song, Y. He, X. Hu and L. Wang, *Angew. Chem. Int. Ed.*, 2018, **57**, 3163–3167.
- (3) M. Hao, G. Sun, M. Zuo, Z. Xu, Y. Chen, X. Hu and L. Wang, *Angew. Chem. Int. Ed.*, 2020, **59**, 10095–10100.
